# Supplementary material for: Do Pomegranate Hydrolyzable Tannins and Their Derived Metabolites Provide Relief in Osteoarthritis? Findings from a Scoping Review
Source: MDPI journal article supplement (doi:10.3390/molecules27031033), 2022-02-03
Supplement: s1 [file s1]

## SUPPLEMENTARY TABLE

**Table S1.** Detailed description of sample preparation and bioactive compound content in the tested products of the reviewed studies.

| Reference                                          | Tested Product                             | Content of the Bioactive Compound(s)                                                                  | Method of Preparation / Supplier                                                                                                                                                                                                                                             |
|----------------------------------------------------|--------------------------------------------|-------------------------------------------------------------------------------------------------------|------------------------------------------------------------------------------------------------------------------------------------------------------------------------------------------------------------------------------------------------------------------------------|
| <b>Human Studies</b>                               |                                            |                                                                                                       |                                                                                                                                                                                                                                                                              |
| Ghoochani et al. 2016 [1]                          | Pomegranate juice                          | n.a.                                                                                                  | n.a.                                                                                                                                                                                                                                                                         |
| Rafraf et al. 2017 [2]                             | Pomegranate peel<br>hydroalcoholic extract | 90% EA on a dry basis                                                                                 | Pomegranate peels were manually separated after juicing and dried under vacuum at 40°C. Then dried peels were grounded in a mill and then subjected to extraction using ethanol-water 80% by the maceration method. The extract was filtered and dried under vacuum at 50°C. |
| Haghighian et al. 2021 [3]                         | Pomegranate peel<br>hydroalcoholic extract | n.a.                                                                                                  | See Haghighian et al. 2021 [3]                                                                                                                                                                                                                                               |
| Schell et al. 2017 [4]                             | Freeze-dried strawberry<br>powder          | TPC: 1585 mg of GAE<br>Total anthocyanins: 66 mg of cyanidin-3-glucoside<br>equivalents<br>EA: 220 mg | California Strawberry Commission (USA)                                                                                                                                                                                                                                       |
| Basu et al. 2018 [5]                               | Freeze-dried strawberry<br>powder          | TPC: 1585 mg of GAE<br>Total anthocyanins: 66 mg of cyanidin-3-glucoside<br>equivalents<br>EA: 220 mg | California Strawberry Commission (USA)                                                                                                                                                                                                                                       |
| Du et al. 2019 [6]                                 | Freeze-dried blueberry<br>powder           | n.a. (referred to a website no longer available)                                                      | US Highbush Blueberry Council (USA)                                                                                                                                                                                                                                          |
| <b>Animal Model Studies</b>                        |                                            |                                                                                                       |                                                                                                                                                                                                                                                                              |
| Hadipour-Jahromy and<br>Mozaffari-Kermani 2010 [7] | Pomegranate juice                          | n.a.                                                                                                  | The fruit seeds were manually separated from the pericarps, and the juice was prepared daily using an electric juice.                                                                                                                                                        |
| Kong et al. 2020 [8]                               | PUNI                                       | –                                                                                                     | Meilun Bio. (China), cat. no: MB6504                                                                                                                                                                                                                                         |
| Yang et al. 2021 [9]                               | Punicalin                                  | –                                                                                                     | Sigma-Aldrich, cat. no: PHL83532                                                                                                                                                                                                                                             |
| Lin et al. 2020 [10]                               | EA                                         | purity ≥ 98%                                                                                          | Solarbio (China)                                                                                                                                                                                                                                                             |
| Fu et al. 2019 [11]                                | Uro-A                                      | purity ≥ 98%                                                                                          | Herbpurify (China)                                                                                                                                                                                                                                                           |
| Shivnath et al. 2021 [12]                          | Pomegranate peel<br>hydroalcoholic extract | TPC: 633 ± 1.16 mg of GAE per g D.W.;<br>TFC: 420.3 ± 2.14 mg RE per gram D.W.                        | The peels of pomegranate were shade dried and subsequently powdered. The 95% ethanolic extract of the powder was prepared using the Soxhlet apparatus. The pooled filtrates were further concentrated under reduced pressure at 40°C.                                        |
| Lee et al. 2018 [13]                               | Pomegranate peel acetone<br>extract        | Punicalagin: 19.1% (concentration range of punicalagin<br>in the calibration curve 25–400 µg/mL)      | The pulverized pomegranate peel was homogenized with 70% aqueous acetone, filtered, concentrated, and further freeze-dried to yield 70% acetone extract of pomegranate peels.                                                                                                |

|                             |                                          |                                                                                               |                                                                                                                                                                                                                                                                                                                                                                                                                                                                                                 |
|-----------------------------|------------------------------------------|-----------------------------------------------------------------------------------------------|-------------------------------------------------------------------------------------------------------------------------------------------------------------------------------------------------------------------------------------------------------------------------------------------------------------------------------------------------------------------------------------------------------------------------------------------------------------------------------------------------|
| Liu et al. 2021 [14]        | PUNI                                     | purity 98%                                                                                    | Feiyubio (Nantong, China)                                                                                                                                                                                                                                                                                                                                                                                                                                                                       |
| Elder et al. 2021 [15]      | PUNI                                     | purity 98%                                                                                    | Biopurify Phytochemicals Ltd. (Sichuan, China),<br>The leaves of <i>Kirganelia reticulata</i> were shade-dried and then powdered using a mechanical grinder. The powder was subjected to extraction using hexane, chloroform, and methanol separately using Soxhlet apparatus. The extracts were evaporated to dryness using a Rotavapor. The obtained methanolic extract was used for the isolation of EA.                                                                                     |
| Shruthi et al. 2014 [16]    | EA                                       | –                                                                                             | The shade dried epicarp and mesocarp parts of the fruits were chopped into small pieces and then crushed into powder by a blender. The powder was macerated in hydroalcoholic solution (50%) and stored in a percolator for 72 h. The extract was dried by a desiccator in 24 h. The extract was then filtered by cellulose acetate membrane syringe filter (pore size 0.2 µm).<br>The extract was prepared by extraction of fruit residue after pressing for juice and solid-phase extraction. |
| Tanideh et al. 2016 [17]    | Mango fruit hydroalcoholic extract       | n.a.                                                                                          |                                                                                                                                                                                                                                                                                                                                                                                                                                                                                                 |
| Akhtar et al. 2017 [18]     | Pomegranate fruit hydroalcoholic extract | n.a.                                                                                          |                                                                                                                                                                                                                                                                                                                                                                                                                                                                                                 |
| Wen et al. 2015 [19]        | GA                                       | –                                                                                             | Sigma-Aldrich (USA)                                                                                                                                                                                                                                                                                                                                                                                                                                                                             |
| <b>Cell Culture Studies</b> |                                          |                                                                                               |                                                                                                                                                                                                                                                                                                                                                                                                                                                                                                 |
| Kong et al. 2020 [8]        | PUNI                                     | –                                                                                             | Meilun Bio. (China), cat. no: MB6504                                                                                                                                                                                                                                                                                                                                                                                                                                                            |
| Yang et al. 2021 [9]        | Punicalin                                | –                                                                                             | Sigma-Aldrich, cat. no: PHL83532                                                                                                                                                                                                                                                                                                                                                                                                                                                                |
| Lee et al. 2018 [13]        | Pomegranate peel acetone extract         | Punicalagin: 19.1% (concentration range of punicalagin in the calibration curve 25–400 µg/mL) | The pulverized pomegranate peel was homogenized with 70% aqueous acetone, filtered, concentrated, and further freeze-dried to yield 70% acetone extract of pomegranate peels.                                                                                                                                                                                                                                                                                                                   |
| Liu et al. 2021 [14]        | PUNI                                     | purity: 98%                                                                                   | Feiyubio (China)                                                                                                                                                                                                                                                                                                                                                                                                                                                                                |
| Ding et al. 2020 [20]       | Uro-A                                    | –                                                                                             | Cayman Chemical (USA)                                                                                                                                                                                                                                                                                                                                                                                                                                                                           |
| Shukla et al. 2008 [21]     | Pomegranate fruit extract                | TPC: 107.5 ± 3 mg/g TAE                                                                       | The methanol-soluble fraction was filtrated, condensed, and freeze-dried.                                                                                                                                                                                                                                                                                                                                                                                                                       |
| Wen et al. 2015 [19]        | GA                                       | –                                                                                             | Sigma-Aldrich (USA)                                                                                                                                                                                                                                                                                                                                                                                                                                                                             |
| Ahmed et al. 2005 [22]      | Pomegranate fruit extract                | n.a.                                                                                          | The methanol-soluble fraction was freeze-dried.                                                                                                                                                                                                                                                                                                                                                                                                                                                 |
| Haseeb et al. 2017 [23]     | Pomegranate fruit extract                | TPC: 107.5 ± 3 mg/g TAE                                                                       | Pomegranate fruit extract is produced in a 2-step process: 1) extraction of fruit residue after pressing for juice and 2) solid-phase extraction to produce a powder.                                                                                                                                                                                                                                                                                                                           |
| Rasheed et al. 2010 [24]    | Pomegranate fruit extract                | TPC: 107.5 ± 3 mg/g TAE                                                                       | See Haseeb et al. 2017 [23]                                                                                                                                                                                                                                                                                                                                                                                                                                                                     |
| Lin et al. 2020 [10]        | EA                                       | purity ≥ 98%                                                                                  | Solarbio (China)                                                                                                                                                                                                                                                                                                                                                                                                                                                                                |
| Fu et al. 2019 [11]         | Uro-A                                    | purity ≥ 98%                                                                                  | Herbpurify (China)                                                                                                                                                                                                                                                                                                                                                                                                                                                                              |

Abbreviations: D.W.: dry weight; EA: ellagic acid; GA: gallic acid; GAE: gallic acid equivalent; n.a.: not available; PUNI: punicalagin; RE: rutin equivalent; TAE: tannic acid equivalent; TFC: total flavonoids content; TPC: total phenolic content; Uro-A: urolithin A.

## References

1. Ghoochani, N.; Karandish, M.; Mowla, K.; Haghighizadeh, M.H.; Jalali, M.T., The effect of pomegranate juice on clinical signs, matrix metalloproteinases and antioxidant status in patients with knee osteoarthritis. *J Sci Food Agric* **2016**, *96*, 4377-4381.
2. Rafrat, M.; Hemmati, S.; Jafarabadi, M.A.; Moghaddam, A.; Haghighian, M.K., Pomegranate (*Punica Granatum* L.) peel hydroalcoholic extract supplementation reduces pain and improves clinical symptoms of knee osteoarthritis: A randomized double-blind placebo controlled study. *Iran Red Crescent Med J* **2017**, *19*, e38577.
3. Haghighian, M.K.; Rafrat, M.; Hemmati, S.; Haghravan, S.; Asghari-Jafarabadi, M., Effects of pomegranate (*Punica granatum* L.) peel extract supplementation on serum lipid profile and oxidative stress in obese women with knee osteoarthritis: A double blind, randomized, placebo controlled study. *Adv Integr Med* **2021**, *8*, 107-113.
4. Schell, J.; Scofield, R.H.; Barrett, J.R.; Kurien, B.T.; Betts, N.; Lyons, T.J.; Zhao, Y.D.; Basu, A., Strawberries improve pain and inflammation in obese adults with radiographic evidence of knee osteoarthritis. *Nutrients* **2017**, *9*, 949.
5. Basu, A.; Kurien, B.T.; Tran, H.; Byrd, B.; Maher, J.; Schell, J.; Masek, E.; Barrett, J.R.; Lyons, T.J.; Betts, N.M., *et al.*, Strawberries decrease circulating levels of tumor necrosis factor and lipid peroxides in obese adults with knee osteoarthritis. *Food Funct* **2018**, *9*, 6218-6226.
6. Du, C.; Smith, A.; Avalos, M.; South, S.; Crabtree, K.; Wang, W.; Kwon, Y.H.; Vijayagopal, P.; Juma, S., Blueberries improve pain, gait performance, and inflammation in individuals with symptomatic knee osteoarthritis. *Nutrients* **2019**, *11*, 290.
7. Hadipour-Jahromy, M.; Mozaffari-Kermani, R., Chondroprotective effects of pomegranate juice on monoiodoacetate-induced osteoarthritis of the knee joint of mice. *Phytother Res* **2010**, *24*, 182-185.
8. Kong, J.; Wang, J.; Gong, X.; Zheng, X.; Chen, T., Punicalagin inhibits *tert*-butyl hydroperoxide-induced apoptosis and extracellular matrix degradation in chondrocytes by activating autophagy and ameliorates murine osteoarthritis. *Drug Des Devel Ther* **2020**, *14*, 5521-5533.
9. Yang, L.; Fan, C.; Shu, T.; Wang, S., Punicalin alleviates TNF- $\alpha$ - and IL-1 $\beta$ -induced chondrocyte dysfunction and cartilage metabolism via mediating FOXO3 signaling axis. *J Food Biochem* **2021**, e13755.
10. Lin, Z.; Lin, C.; Fu, C.; Lu, H.; Jin, H.; Chen, Q.; Pan, J., The protective effect of ellagic acid (EA) in osteoarthritis: An *in vitro* and *in vivo* study. *Biomed Pharmacother* **2020**, *125*, 109845.
11. Fu, X.; Gong, L.F.; Wu, Y.F.; Lin, Z.; Jiang, B.J.; Wu, L.; Yu, K.H., Urolithin A targets the PI3K/Akt/NF- $\kappa$ B pathways and prevents IL-1 $\beta$ -induced inflammatory response in human osteoarthritis: *in vitro* and *in vivo* studies. *Food Funct* **2019**, *10*, 6135-6146.
12. Shivnath, N.; Rawat, V.; Siddiqui, S.; Verma, S.; Gupta, P.; Rais, J.; Khan, M.S.; Arshad, M., Antiosteoarthritic effect of *Punica granatum* L. peel extract on collagenase induced osteoarthritis rat by modulation of COL-2, MMP-3, and COX-2 expression. *Environ Toxicol* **2021**, *36*, 5-15.
13. Lee, C.J.; Chen, L.G.; Liang, W.L.; Hsieh, M.S.; Wang, C.C., Inhibitory effects of punicalagin from *Punica granatum* against type II collagenase-induced osteoarthritis. *J Funct Foods* **2018**, *41*, 216-222.
14. Liu, F.; Yang, H.; Li, D.; Wu, X.; Han, Q., Punicalagin attenuates osteoarthritis progression via regulating Foxo1/PrG4/HIF3 $\alpha$  axis. *Bone* **2021**, *152*, 116070.
15. Elder, S.H.; Mosher, M.L.; Jarquin, P.; Smith, P.; Chironis, A., Effects of short-duration treatment of cartilage with punicalagin and genipin and the implications for treatment of osteoarthritis. *J Biomed Mater Res B Appl Biomater* **2021**, *109*, 818-828.
16. Shruthi, S.D.; Sujana Ganapathy, P.S.; Kumar, R.; Shivakumara; Dharshan, J.C.; Ramachandra, Y.L., *In vivo*, *in vitro* anti-arthritic studies of ellagic acid from *Kirganelia reticulata* baill and its molecular docking. *J Appl Pharm Sci* **2014**, *4*, 24-31.
17. Tanideh, N.; Nazhvani, S.D.; Bahrami, A.; Mehrabani, D.; Akbarzadeh, A.; Azarpira, N.; Lotfi, M.; bagheri, M.H.; Koohi-Hosseiniabadi, O., The effect of hydroalcoholic extract of *Mangifera indica* on induced osteoarthritis of knee in male guinea pigs. *Comp Clin Path* **2016**, *25*, 973-979.
18. Akhtar, N.; Khan, N.M.; Ashruf, O.S.; Haqqi, T.M., Inhibition of cartilage degradation and suppression of PGE<sub>2</sub> and MMPs expression by pomegranate fruit extract in a model of posttraumatic osteoarthritis. *Nutrition* **2017**, *33*, 1-13.
19. Wen, L.; Qu, T.B.; Zhai, K.; Ding, J.; Hai, Y.; Zhou, J.L., Gallic acid can play a chondroprotective role against AGE-induced osteoarthritis progression. *J Orthop Sci* **2015**, *20*, 734-741.
20. Ding, S.L.; Pang, Z.Y.; Chen, X.M.; Li, Z.; Liu, X.X.; Zhai, Q.L.; Huang, J.M.; Ruan, Z.Y., Urolithin A attenuates IL-1 $\beta$ -induced inflammatory responses and cartilage degradation via inhibiting the MAPK/NF- $\kappa$ B signaling pathways in rat articular chondrocytes. *J Inflamm (Lond)* **2020**, *17*, 13.

21. Shukla, M.; Gupta, K.; Rasheed, Z.; Khan, K.A.; Haqqi, T.M., Bioavailable constituents/metabolites of pomegranate (*Punica granatum* L) preferentially inhibit COX2 activity *ex vivo* and IL-1 $\beta$ -induced PGE<sub>2</sub> production in human chondrocytes *in vitro*. *J Inflamm (Lond)* **2008**, *5*, 9.
22. Ahmed, S.; Wang, N.; Hafeez, B.B.; Cheruvu, V.K.; Haqqi, T.M., *Punica granatum* L. extracts inhibits IL-1 $\beta$ -induced expression of matrix metalloproteinases by inhibiting the activation of MAP kinases and NF- $\kappa$ B in human chondrocytes *in vitro*. *J Nutr* **2005**, *135*, 2096-2102.
23. Haseeb, A.; Khan, N.M.; Ashruf, O.S.; Haqqi, T.M., A polyphenol-rich pomegranate fruit extract suppresses NF- $\kappa$ B and IL-6 expression by blocking the activation of IKK $\beta$  and NIK in primary human chondrocytes. *Phytother Res* **2017**, *31*, 778-782.
24. Rasheed, Z.; Akhtar, N.; Haqqi, T.M., Pomegranate extract inhibits the interleukin-1 $\beta$ -induced activation of MKK-3, p38 $\alpha$ -MAPK and transcription factor RUNX-2 in human osteoarthritis chondrocytes. *Arthritis Res Ther* **2010**, *12*, R195.
